# Supplementary material for: Patterns and predictors of sick leave among Swedish non-hospitalized healthcare and residential care workers with Covid-19 during the early phase of the pandemic
Source: PubMed Central journal article supplement (PMC8659339; doi:10.1371/journal.pone.0260652), 2021-12-09

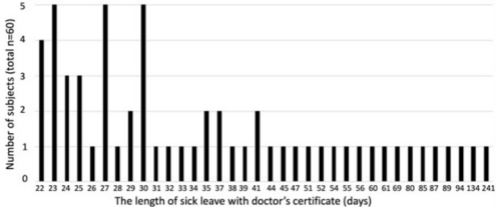

Supplement: pone.0260652.s001.pdf [file pone.0260652.s001.pdf]
